# Supplementary material for: QTL Mapping and Candidate Gene Analysis for Seed Germination Response to Low Temperature in Rice
Source: MDPI journal article supplement (doi:10.3390/ijms23137379), 2022-07-02
Supplement: s1 [file s1]

## Supplementary tables

**Table S1.** Phenotypic values of germination percentage in CNDH population

| Replicates | Temperature (°C) | Parents      |             | CNDH Population |      |             |
|------------|------------------|--------------|-------------|-----------------|------|-------------|
|            |                  | Cheongcheong | Nagdong     | Max.            | Min. | Mean        |
| 1          | 15               | 0.0 ± 0.0    | 70.0 ± 3.3  | 100.0           | 0.0  | 38.0 ± 31.9 |
| 2          |                  | 0.0 ± 0.0    | 66.7 ± 1.7  | 100.0           | 0.0  | 37.6 ± 31.3 |
| 1          | 20               | 56.7 ± 1.7   | 100.0 ± 0.0 | 100.0           | 23.3 | 88.2 ± 17.6 |
| 2          |                  | 55.0 ± 0.8   | 100.0 ± 0.0 | 100.0           | 25.0 | 88.9 ± 16.6 |

The data are presented as mean ± standard deviation. The GP was investigated under different temperature conditions.

**Table S2.** 25 genes related to seed germination were screened from the interval RM7197-RM15063 on chromosome 3.

| Function           | Locus          | Description                                                                                                                                      | No. of Genes |
|--------------------|----------------|--------------------------------------------------------------------------------------------------------------------------------------------------|--------------|
| Cell function      | LOC_Os03g25990 | Similar to Expansin (Expansin2)                                                                                                                  | 1            |
| Embryo development | LOC_Os03g20910 | Homeodomain-like containing protein                                                                                                              | 2            |
|                    | LOC_Os03g24380 | Similar to Glutathione peroxidase                                                                                                                |              |
| Hormone            | LOC_Os03g19420 | Nicotianamine synthase 2 (EC 2.5.1.43) (S-adenosyl-L-methionine:S-adenosyl-L-methionine:3-amino-3-carboxypropyl-transferase 2) ( <i>OsNAS2</i> ) | 13           |
|                    | LOC_Os03g19427 | Nicotianamine synthase 1 (EC 2.5.1.43) (S-adenosyl-L-methionine:S-adenosyl-L-methionine:3-amino-3-carboxypropyl-transferase 1) ( <i>OsNAS1</i> ) |              |
|                    | LOC_Os03g19480 | SET domain-containing protein                                                                                                                    |              |
|                    | LOC_Os03g19500 | Ubiquitin-conjugating enzyme, E2 domain containing protein                                                                                       |              |
|                    | LOC_Os03g20120 | Similar to Galactinol synthase (Fragment)                                                                                                        |              |
|                    | LOC_Os03g20550 | Similar to WRKY transcription factor 55                                                                                                          |              |
|                    | LOC_Os03g21040 | Ricin B-related lectin domain containing protein                                                                                                 |              |
|                    | LOC_Os03g21400 | Cytochrome P450 family protein                                                                                                                   |              |
|                    | LOC_Os03g22590 | Similar to Senescence-associated protein (SAG29)                                                                                                 |              |
|                    | LOC_Os03g24930 | Similar to Phytosulfokine receptor-like protein                                                                                                  |              |
|                    | LOC_Os03g25480 | Similar to Cytochrome P450                                                                                                                       |              |
|                    | LOC_Os03g25490 | Similar to Cytochrome P450                                                                                                                       |              |
|                    | LOC_Os03g25500 | Cytochrome P450 family protein                                                                                                                   |              |
| Signaling          | LOC_Os03g17980 | <i>OSK3 (OSK5)</i>                                                                                                                               | 4            |
|                    | LOC_Os03g18150 | Protein phosphatase 2C family protein                                                                                                            |              |
|                    | LOC_Os03g18600 | Streptomyces cyclase/dehydrase family protein                                                                                                    |              |
|                    | LOC_Os03g22770 | Similar to CONSTANS-like protein CO9 (Fragment)                                                                                                  |              |

|                  |                |                                                                                             |   |
|------------------|----------------|---------------------------------------------------------------------------------------------|---|
| Seed germination | LOC_Os03g21710 | Similar to WRKY1 (WRKY transcription factor 17)                                             | 5 |
|                  | LOC_Os03g23960 | IQ calmodulin-binding region domain containing protein                                      |   |
|                  | LOC_Os03g25030 | Lipolytic enzyme, G-D-S-L family protein                                                    |   |
|                  | LOC_Os03g25040 | Lipolytic enzyme, G-D-S-L family protein                                                    |   |
|                  | LOC_Os03g25350 | Plant lipid transfer/seed storage/trypsin-alpha amylase inhibitor domain containing protein |   |

---

**Table S3.** 7 genes related to seed germination were screened from the interval RM528-RM20632 on chromosome 6.

| Function           | Locus          | Description                                                   | No. of Genes |
|--------------------|----------------|---------------------------------------------------------------|--------------|
| Embryo development | LOC_Os06g45640 | Similar to Nuclear Y/CCAAT-box binding factor C subunit NF-YC | 1            |
| Hormone            | LOC_Os06g45960 | Cytochrome P450 family protein                                | 3            |
|                    | LOC_Os06g46680 | Cytochrome P450 family protein                                |              |
|                    | LOC_Os06g46740 | Cupredoxin domain containing protein                          |              |
| Signaling          | LOC_Os06g44970 | Similar to Auxin efflux carrier protein                       | 2            |
|                    | LOC_Os06g45300 | Serine/threonine protein kinase-like protein                  |              |
| Seed development   | LOC_Os06g46330 | Protein kinase-like domain containing protein                 | 1            |

**Table S4.** 9 genes related to seed germination were screened from the interval RM23314-RM23178 on chromosome 8.

| Function           | Locus          | Description                                                                             | No. of Genes |
|--------------------|----------------|-----------------------------------------------------------------------------------------|--------------|
| Embryo development | LOC_Os08g34380 | Similar to SERK1 (Fragment)                                                             | 3            |
|                    | LOC_Os08g34640 | Similar to Receptor-like protein kinase precursor (EC 2.7.1.37). Splice isoform INRPK1a |              |
|                    | LOC_Os08g36440 | TB2/DP1 and HVA22 related protein family protein                                        |              |
| Hormone            | LOC_Os08g34210 | Glyceraldehyde-3-phosphate dehydrogenase                                                | 3            |
|                    | LOC_Os08g36310 | Cytochrome P450 family protein                                                          |              |
|                    | LOC_Os08g36860 | Cytochrome P450 family protein                                                          |              |
| Seed dormancy      | LOC_Os08g36910 | Alpha-amylase isozyme 3D precursor (EC 3.2.1.1) (1,4-alpha-D-glucan glucanohydrolase)   | 1            |
| Seed germination   | LOC_Os08g35110 | Auxin responsive SAUR protein family protein                                            | 2            |
|                    | LOC_Os08g36790 | TRAB1 (BZIP transcription factor)                                                       |              |

**Table S5.** List of primers used for qRT-PCR experiments.

| Name                         | Forward primers (5'-3') | Reverse primers (5'-3') |
|------------------------------|-------------------------|-------------------------|
| <i>Os03g0377100</i>          | GCAAGTCCATCGTGGTGAC     | AGTAGGAGTGCCCGTTGATG    |
| <i>Os03g0325600</i>          | ATTACCTGCAGCGACGATCA    | TCGGAGTAGAGAGAGAGCGAT   |
| <i>Os03g0358100</i>          | GGGAAGGTGCTAATCGTCGT    | CGCAAGAACTGATTGCAGGG    |
| <i>Os03g0289100 (OSK3)</i>   | GCATGGTTTCTGTGACACACC   | TGACGCAAGATCCAAGCTGT    |
| <i>Os03g0307200</i>          | GTGTTCGACAACTACGACCG    | CAGACGGATAGCCTCTTGG     |
| <i>Os03g0307300</i>          | CGTACTACGGCAACTACGTCA   | AGACGGACAGCTCCTTGTTG    |
| <i>Os03g0307800</i>          | CCTCCGATTCTCTTCCCAAC    | CCCATGGAGACGGCAATCAA    |
| <i>Os03g0308000</i>          | GATGAGCATGCACACAAGGC    | AGTCCAAATGCAGCCAAGGT    |
| <i>Os03g0316200</i>          | GTACAAGCCGATCCCCTGA     | AGCTGGACGTTCTCTGGATG    |
| <i>Os03g0321700</i>          | ACGGCATTCGGAAGCCTATT    | AGATTGGAGCTCAGTGCAGG    |
| <i>Os03g0327600</i>          | CACCTTCAAGATCTTCTGCCG   | TCGAAGTTGAGGCGGATGTT    |
| <i>Os03g0332000</i>          | TGGTCAGGGCTTTGCTATGG    | CATCTTCCCTTGCACTCTCGT   |
| <i>Os03g0347500</i>          | ATTGGTCTTTGCTGTGGGGA    | CCGATAAAACGTCGGCACTG    |
| <i>Os03g0364400</i>          | TCGTCTACGAGTTCATGCCG    | TCCGAGTCGAGGAGGATGTT    |
| <i>Os03g0370900</i>          | CAATGATCGGCAAAGGGCTG    | GTTGCTATGGCAATGGCCTG    |
| <i>Os03g0371000</i>          | AGGCTCTATGGTCCTGCTCT    | CTCCTTGTCCCGGTGCATAA    |
| <i>Os03g0371400</i>          | CGTGGACCTGCCTACAAGTT    | AGGTGCTATCCTTGGGAGGT    |
| <i>Os03g0292100 (OsPP2C)</i> | GACAGTGGCGAGACTGAACA    | TTAGACACAACGAGGCCACC    |
| <i>Os03g0297600 (OsPYL)</i>  | AGCACCGCCTCAAGAACTAC    | GTCTTGGCGAGAGACTGGAG    |

|                     |                        |                      |
|---------------------|------------------------|----------------------|
| <i>Os03g0351100</i> | CCATCTTCCCCCAAGATTCAGA | TAGAACTTGCATTGGCGTGC |
| <i>Os03g0335200</i> | CCGCAACACTAGAAGACGGT   | TGTGCGTGCACCTGTAGTAG |
| <i>Os03g0355700</i> | GGAGAGGAAGAGGAGGGGAT   | TTCACCTTCTTGTCCGGCTT |
| <i>Os03g0365800</i> | CGACTTCCTAGCGGATGATCT  | GCCTCCAACCTCACCCATTA |
| <i>Os03g0365900</i> | AGAGCGCAAGGACATTACG    | GAGAAACCTCGGAATGCAGC |
| <i>Os03g0369100</i> | TGCAAGAAGTACGAGGGGTG   | AGACGACCTTCTCCATGCAC |

---

**Table S6.** Accession number of genes mentioned in figure 6C.

| Specie name             | Gene name     | Accession number             |
|-------------------------|---------------|------------------------------|
| <i>Oryza sativa</i>     | <i>OsGPq3</i> | NM_001402138<br>XM_015776763 |
| <i>Seteria italica</i>  | <i>OSK3</i>   | XM_012843081                 |
| <i>Panicum hallii</i>   | <i>OSK3</i>   | XM_025940294                 |
| <i>Panicum virgatum</i> | <i>OSK3</i>   | XM_039930633                 |
| <i>Sorghum bicolor</i>  | <i>OSK4</i>   | XM_021450779                 |
| <i>Zea mays</i>         | <i>SNF1</i>   | NM_001301590<br>XM_008671745 |
| <i>Zea mays</i>         | <i>OSK4</i>   | PWZ55924                     |
